# Supplementary material
Source: PubMed Central journal article supplement (PMC4409001)
Supplement: NIHMS682377-supplement-Supplemental_Material_Inventory.pdf [file NIHMS682377-supplement-Supplemental_Material_Inventory.pdf]

**Inventory of Supplementary Materials uploaded as separate files:**

| <i>Filename</i> | <i>Description</i> | <i>Type</i> | <i>Size</i> |
|-----------------|--------------------|-------------|-------------|
| 1253320s1.m4v   | MovieS1            | MPEG-4      | 3.2 MB      |
| 1253320s2.m4v   | MovieS2            | MPEG-4      | 9.7 MB      |
| 1253320s3.m4v   | MovieS3            | MPEG-4      | 2.6 MB      |
| 1253320s4.m4v   | MovieS4            | MPEG-4      | 2.3 MB      |
| 1253320s5.m4v   | MovieS5            | MPEG-4      | 3.7 MB      |
| 1253320s6.m4v   | MovieS6            | MPEG-4      | 3.5 MB      |
| 1253320s7.m4v   | MovieS7            | MPEG-4      | 1.8 MB      |
| 1253320s8.m4v   | MovieS8            | MPEG-4      | 2.8 MB      |
| 1253320s9.m4v   | MovieS9            | MPEG-4      | 3.6 MB      |
| 1253320s10.m4v  | MovieS10           | MPEG-4      | 2.3 MB      |
| 1253320s11.m4v  | MovieS11           | MPEG-4      | 4.4 MB      |
| 1253320s12.m4v  | MovieS12           | MPEG-4      | 5 MB        |
| 1253320s13.m4v  | MovieS13           | MPEG-4      | 3.4 MB      |
| 1253320s14.m4v  | MovieS14           | MPEG-4      | 2 MB        |
| 1253320s15.m4v  | MovieS15           | MPEG-4      | 3.8 MB      |
| 1253320s16.m4v  | MovieS16           | MPEG-4      | 3.3 MB      |
| 1253320s17.zip  | Datasets S1 to S7  | Zip archive | 492 KB      |
